# Supplementary material
Source: PubMed Central journal article supplement (PMC5312552)
Supplement: Supp_Fig1.pdf [file Supp_Fig1.pdf]

## Supplementary Data

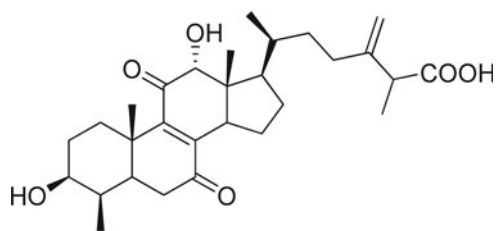

Antcin H

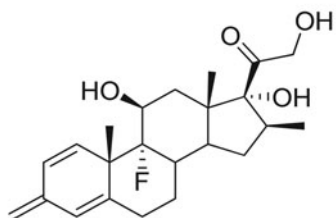

Dexamethasone

**SUPPLEMENTARY FIG. S1. Structures of Antcin H and dexamethasone.**
