# Supplementary material
Source: PubMed Central journal article supplement (PMC5312552)
Supplement: Supp_Fig2.pdf [file Supp_Fig2.pdf]

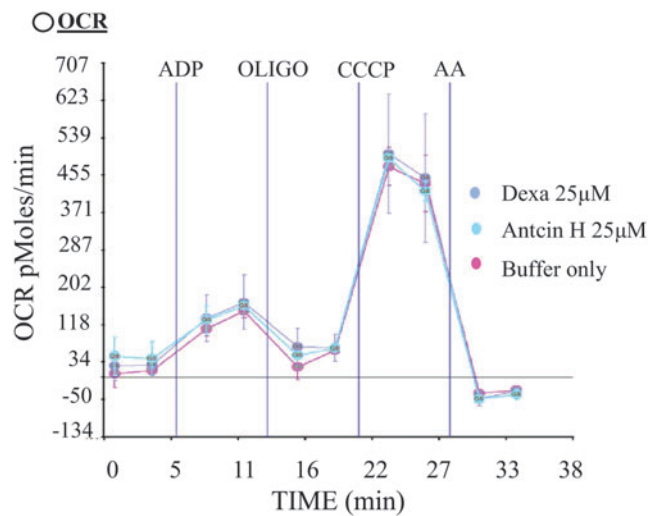

**SUPPLEMENTARY FIG. S2. Effect of Antcin H and dexamethasone (Dexa) on the basal mitochondrial respiration.** Mitochondria were incubated with Antcin H (25  $\mu$ M) or Dexa (25  $\mu$ M) in vehicle for 30 min, and OCR was measured as described in the Materials and Methods section in the absence of JNK. The data represent mean  $\pm$  SD. Mean of five wells for each experiment. The results are representative of three experiments with different mitochondria preps. JNK = c-Jun-N-terminal kinase.
